# Supplementary material for: A process-based assessment of landscape change and salmon habitat losses in the Chehalis River basin, USA
Source: PLOS journal article supplement (doi:10.1371/journal.pone.0258251), 2021-11-02

**S1 Figure. Habitat distributions by species.** Distribution of spawning and rearing habitat for each of the four salmon runs in the Chehalis River basin ([http://geo.wa.gov/datasets/4ed1382bad264555b018cc8c934f1c01\\_0](http://geo.wa.gov/datasets/4ed1382bad264555b018cc8c934f1c01_0)). Distributions represent potential distribution, including habitat above man-made migration barriers.

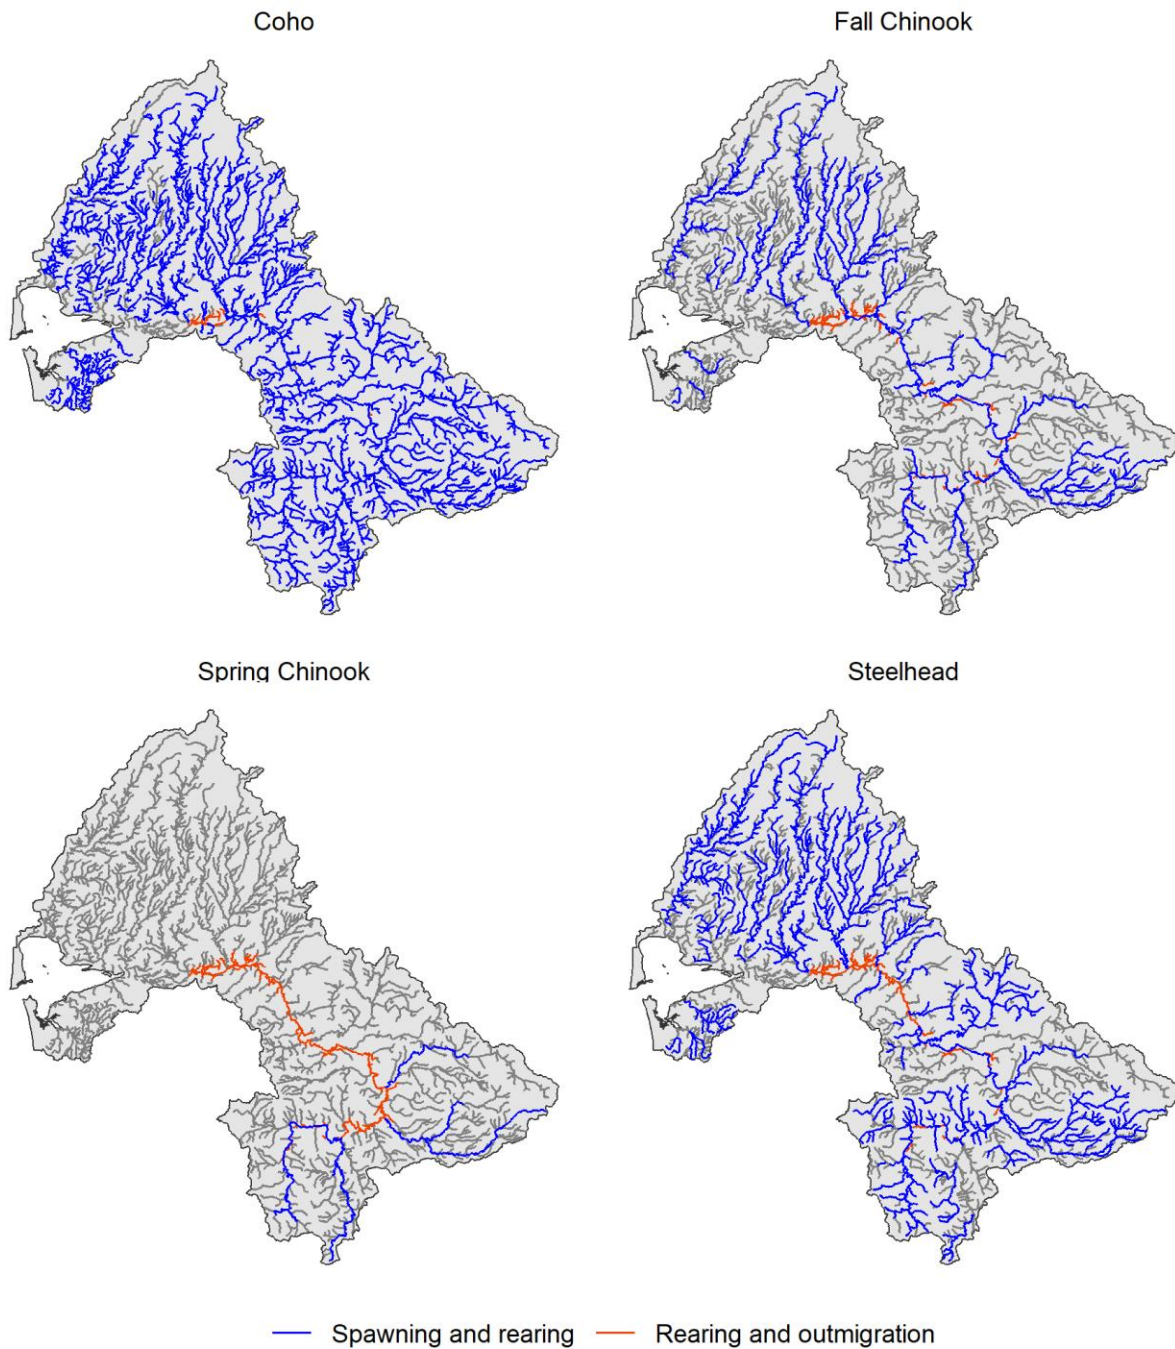

Supplement: S1 (10.1371/journal.pone.0258251.s001) [file journal.pone.0258251.s001]
